# Supplementary material for: Analysis of pesticide residues by leaf spray mass spectrometry
Source: Royal Society of Chemistry journal article supplement (doi:10.1039/c2ay25222h), 2012-01-01
Supplement: c2ay25222h.pdf [file c2ay25222h.pdf]

## Supporting Information

### Analysis of Pesticide Residues by Leaf Spray Mass Spectrometry

Naim Malaj<sup>1</sup>, Zheng Ouyang<sup>2</sup>, Giovanni Sindona<sup>1</sup> and R. Graham Cooks<sup>3\*</sup>

<sup>1</sup>Dipartimento di Chimica, Università della Calabria, I-87036 Arcavacata di Rende, CS, Italy

<sup>2</sup>Weldon School of Biomedical Engineering, Purdue University, 47907 West Lafayette, IN, USA

<sup>3</sup>Department of Chemistry, Purdue University, 47907 West Lafayette, IN, USA

\*To whom the correspondence should be addressed

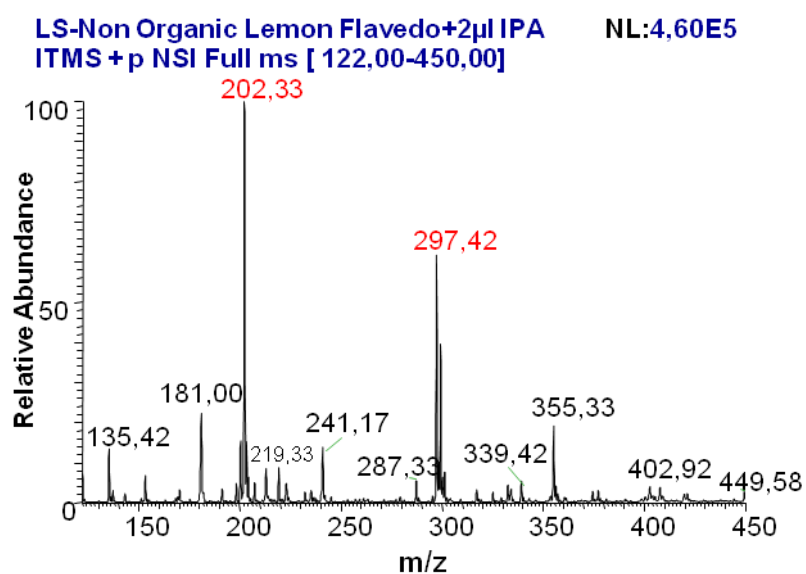

Figure S-1. Full scan mass spectrum of non organic lemon flavedo. Signals of thiabendazole (m/z 202) and imazalil (m/z 297) are indicated in red.

**LS-Non Organic Orange (Navel) Albedo + 2µL IPA**  
**ITMS + p NSI Full ms [122,00-450,00] NL: 7,29E4**

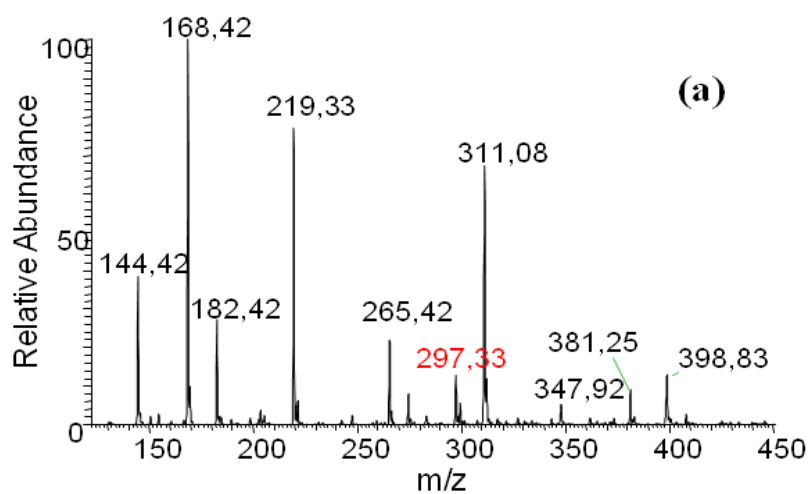

**LS-Non Organic Lemon Albedo + 2µL IPA**  
**ITMS + p NSI Full ms [122,00-450,00] NL: 1,51E5**

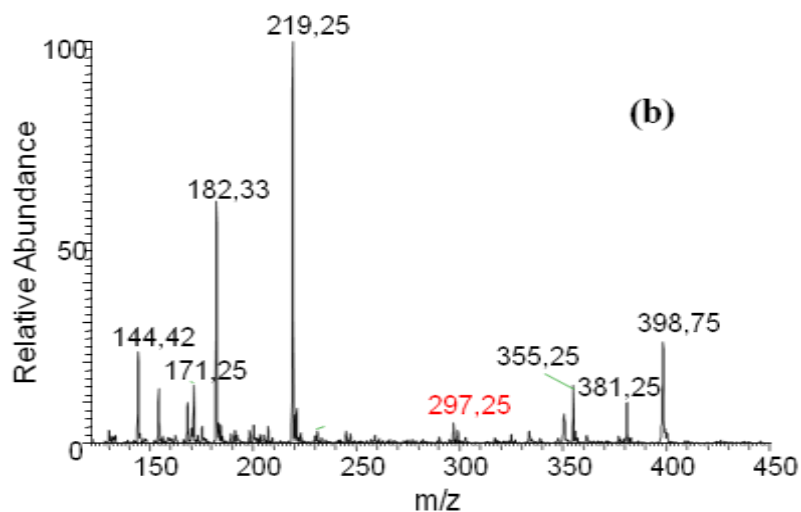

Figure S-2. Full-scan mass spectra of non-organic orange (a) and lemon (b) albedo showing the presence of only imazalil on these tissues (thiabendazole is absent).
